# Supplementary material
Source: Research Square preprint supplement (doi:10.21203/rs.3.rs-10026662/v1)
Supplement: Supplementary file 1 [file 03f49a3f5e71416dad9cab73.docx]

## Supplementary Information

### 1. Model for mosquito states at 24 hours and transition probabilities.

Mosquitoes introduced to the IACT chamber are initially in the unfed-alive state. The proportion of mosquitoes that remain in this state () is obtained from:

|  | (S1) |
| --- | --- |

where the time unit is the period that the mosquitoes remain in the chamber (1 night), so the final state is given by the solution for , which is:

|  | (S2) |
| --- | --- |

The proportion found in the unfed-dead state is then:

|  | (S3) |
| --- | --- |

Correspondingly, the proportion fed is:

|  | (S4) |
| --- | --- |

Assuming the post-prandial mortality rate to be the same as the pre-prandial mortality rate, the overall proportion surviving is , so the proportion fed and alive is:

|  | (S5) |
| --- | --- |

and the proportion fed and dead is:

| . | (S6) |
| --- | --- |

Equivalently the model can be formulated as a Markov model with transitions corresponding to the processes of attacking, feeding, and post-prandial survival, with transition probabilities , , and respectively (as in some previous publications [1-3]). Equation S7 gives the relationships between these transition probabilities and the state probabilities derived from the ODE model:

|  | (S7) |
| --- | --- |

### 2. Model B: allowing for inter-annual variation in mosquito mortality and feeding success

In principle, measured mosquito mortality and feeding success might change with the age of a net because of either:

- measurable damage and loss of insecticide;

- other unspecified factors changing the functioning of the net;

- temporal variation in the test system.

To evaluate this an additional model (Model B) was fitted in which the net-independent mortality, , and the maximal rate of feeding, , were allowed to vary between study periods (years), corresponding to the age categories of nets. The comparison of model fit for Model B with the default using leave-one-out cross-validation [4] is provided in Table S1. This model fitted better than the default model, as assessed by the looic criterion.

Table S1. Comparison of model fit (using R package loo)

| Variable | Estimated quantity | Model A: Default model | | Model B: Time period model | | Model C: Logistic model | |
| --- | --- | --- | --- | --- | --- | --- | --- |
|  |  | estimate | s.e. | estimate | s.e. | estimate | s.e. |
| elpd_loo | expected log pointwise predictive density | -6088.6 | 200.1 | -6053.6 | 200.3 | -6178.3 | 186.5 |
| p_loo | penalization term related to the complexity of the model | 53.0 | 6.5 | 70.7 | 7.4 | 55.4 | 4.6 |
| looic | Leave-one-out information criterion | 12177.3 | 400.1 | 12107.2 | 400.6 | 12356.6 | 373.0 |

The estimated net-independent mortality in Model B, , decreased with year (Figure S1) with a similar trend to that observed in the mortality of (no net) controls. This implies that inter-annual variation in is mainly accounted for by temporal variations in the test system. Neither nor the proportion of fed mosquitoes recovered from control tests without nets, varied much between years.

Figure S1. Outcomes for control (no-net) tests


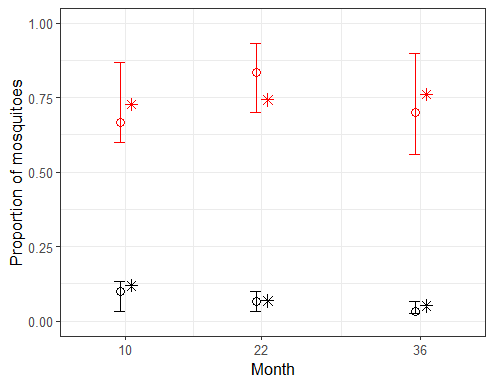


Circles and error bars correspond respectively to medians and quartiles of the data. Stars (*) are the fitted values from the model allowing for inter-annual variation. Black: proportion of mosquitoes dead; red: proportion of mosquitoes fed.

The effects of the nets on mortality and feeding rates can be estimated from the differences between the fitted values of the mortality and feeding rates for the sampled nets, and the corresponding values for no-net controls. The mean values for both the overall rates and the attributable rates computed this way are given in Table S2:

Table S2. Means of Model B-based estimates of mortality and feeding rates by year

| Net type | Month | Mortality rate | Mortality attributed to insecticide | Feeding rate | Feeding inhibition attributed to net |
| --- | --- | --- | --- | --- | --- |
| No net | 10 | 0.127 | 0 | 1.37 | 0 |
| 22 | 0.0705 | 0 | 1.6 | 0 |
| 36 | 0.0519 | 0 | 1.38 | 0 |
| Olyset® | 10 | 1.55 | 1.43 | 0.034 | 1.34 |
| 22 | 1.42 | 1.35 | 0.081 | 1.52 |
| 36 | 1.3 | 1.25 | 0.068 | 1.31 |
| PermaNet | 10 | 3.14 | 3.02 | 0.030 | 1.34 |
| 22 | 2.91 | 2.84 | 0.072 | 1.53 |
| 36 | 2.44 | 2.39 | 0.061 | 1.32 |
| NetProtect | 10 | 3.19 | 3.07 | 0.021 | 1.35 |
| 22 | 3.08 | 3.01 | 0.042 | 1.56 |
| 36 | 2.91 | 2.85 | 0.083 | 1.29 |

Most of the mosquito mortality and feeding inhibition can be attributed to the insecticide and barrier effect of the nets. On both measures the variation between time periods in net performance is small.

### 3. Model C: Logistic model for transition probabilities

Some previous experimental hut studies of physical and chemical decay in LLINs [1-3] have used logistic models for the transition probabilities, and , with the expected values as given in equation S8 and the distributions around the expected values specified as binomial.

is here the holed area of the net in cm2.

The parameter estimates from the default model are given in Table 5 of the main text. Table S3 gives the parameter estimates for the logistic model.. The default model has superior predictive value as indicated by the higher value of the expected log pointwise predictive density and the lower value of the leave-one-out information criterion. The model is also preferred because it is more parsimonious and the parameters are more readily interpretable.

Table S3. Parameter estimates for the logistic model

|  |  | Estimate | 95% interval |
| --- | --- | --- | --- |
|  | Differential insecticide effect* | 105.8 | (66.2, 201.8) |
|  | Attacking:_intercept | -1.27 | (-1.46, -1.07) |
|  | Attacking:_hole effect | 0.004 | (-0.005, 0.012) |
|  | Attacking:_insecticide effect | -0.049 | (-0.086, -0.024) |
|  | Attacking:_interaction | 0.00020 | (-0.00018, 0.00091) |
|  | Preprandial killing: intercept | 20.5 | (19.8, 21.1) |
|  | Preprandial killing: hole effect | -0.96 | (-0.99, -0.92) |
|  | Preprandial killing: insecticide effect | -0.15 | (-0.24, -0.08) |
|  | Preprandial killing: interaction | 0.010 | (0.005, 0.016) |
|  | Postprandial killing: intercept | 9.5 | (8.3, 10.7) |
|  | Postprandial killing: hole effect | -0.52 | (-0.58, -0.47) |
|  | Postprandial killing: insecticide effect | -0.08 | (-0.16, -0.03) |
|  | Postprandial killing: interaction | 0.0063 | (0.0028, 0.0113) |

*This is the value of for nets impregnated with deltamethrin. The value for permethrin nets is 1.

### 4. Data, model fitting and model comparison

The data are provided as file ‘ABCDR data.csv’ and the R code for the model fitting is provided as ‘ABCDR.r’. This includes options for the analysis in stan of the three different models.

**References**

1. Briet O, Koenker H, Norris L, Wiegand R, Vanden Eng J, Thackeray A, Williamson J, Gimnig JE, Fortes F, Akogbeto M, et al: **Attrition, physical integrity and insecticidal activity of long-lasting insecticidal nets in sub-Saharan Africa and modelling of their impact on vectorial capacity.** *Malaria Journal* 2020, **19:**310.

2. Briët OJT, Impoinvil DE, Chitnis N, Pothin E, Lemoine JF, Frederic J, Smith TA: **Models of effectiveness of interventions against malaria transmitted by Anopheles albimanus.** *Malaria Journal* 2019, **18:**263.

3. Randriamaherijaona S, Briët OJ, Boyer S, Bouraima A, N'Guessan R, Rogier C, Corbel V: **Do holes in long-lasting insecticidal nets compromise their efficacy against pyrethroid resistant *Anopheles gambiae* and *Culex quinquefasciatus*? Results from a release-recapture study in experimental huts.** *Mal J* 2015, **14**.

4. Vehtari A, Gelman A, Gabry J: **Practical Bayesian model evaluation using leave-one-out cross-validation and WAIC.** *Statistics and Computing* 2017, **27:**1413–1432.
